# Supplementary material
Source: PubMed Central journal article supplement (PMC6753658)
Supplement: bc9b00490_si_001.pdf [file bc9b00490_si_001.pdf]

## Supporting Information

### Efficient Small-Scale Conjugation of DNA to Primary Antibodies for Multiplexed Cellular Targeting

Glenn A.O. Cremers,<sup>†ab</sup> Bas J.H.M. Rosier,<sup>†ab</sup> Roger Riera Brillas,<sup>ac</sup> Lorenzo Albertazzi,<sup>ac</sup> Tom F.A. de Greef<sup>\*abd</sup>

<sup>a</sup> Laboratory of Chemical Biology and Institute for Complex Molecular Systems, Eindhoven University of Technology, P.O. Box 513, 5600 MB Eindhoven, The Netherlands

<sup>b</sup> Computational Biology Group, Department of Biomedical Engineering, Eindhoven University of Technology, P.O. Box 513, 5600 MB Eindhoven, The Netherlands

<sup>c</sup> Molecular Biosensing for Medical Diagnostics, Department of Biomedical Engineering, Eindhoven University of Technology, P.O. Box 513, 5600 MB Eindhoven, The Netherlands

<sup>d</sup> Institute for Molecules and Materials, Radboud University, Heyendaalseweg 135, 6525 AJ Nijmegen, The Netherlands.

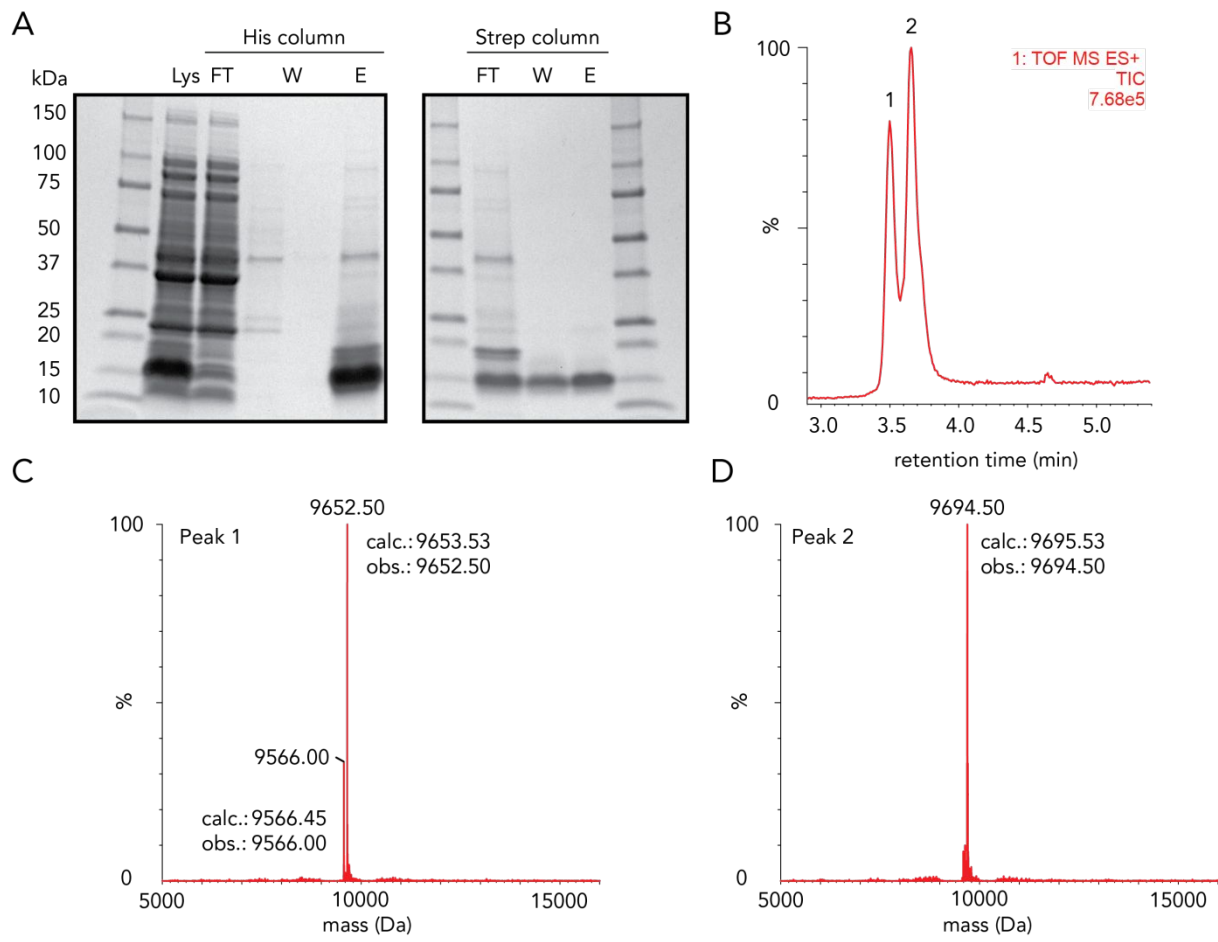

**Figure S1.** Purification and characterization of pG. (A) SDS-PAGE gel analysis of affinity-tag based purification of pG. (calculated mass: 9784.64 Da). pG runs at an apparent mass of 14 kDa. Labels: Lys, lysate; FT, flow through; W, wash; E, elution. (B) Chromatogram of pG analyzed by liquid chromatography quadrupole time-of-flight mass spectrometry. (C) Deconvoluted mass spectrum of peak 1 shows 2 peaks corresponding to pG without the N-terminal methionine (9652.5 Da) and serine (9566.0 Da). (D) Deconvoluted mass spectrum of peak 2 shows 1 peak corresponding to acetylated pG without the N-terminal methionine (9694.5 Da).

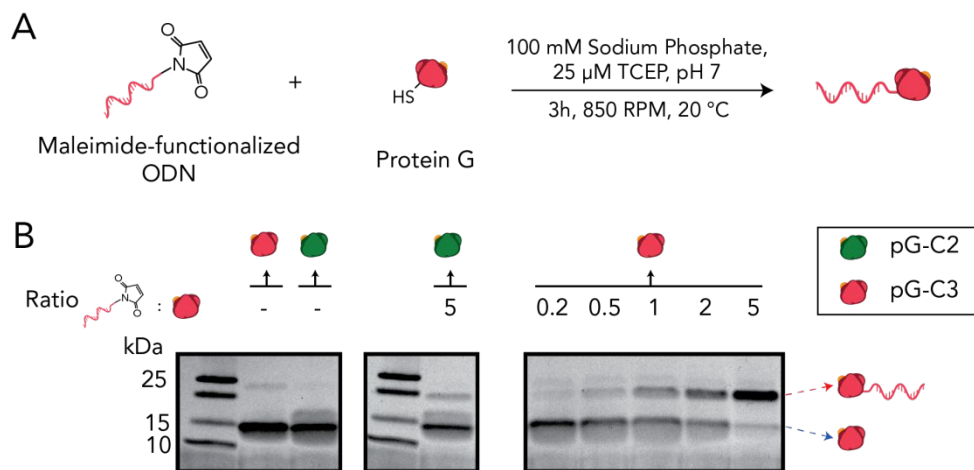

**Figure S2.** Schematic overview of the protein G-oligonucleotide (pG-ODN) coupling. (A) Reaction conditions for pG-ODN coupling. (B) SDS-PAGE gel analysis under non-reducing conditions of the pG-ODN reaction mixture. Using a 5-fold molar excess of maleimide-functionalized ODN, >90% of pG-C<sub>3</sub> is successfully labeled with an ODN compared to ~15% of pG-C<sub>2</sub>. Labels: pG-C<sub>2</sub>, pG with the cysteine directly after the N-terminal methionine; pG-C<sub>3</sub>, pG with a serine placed N-terminally of the cysteine. Amino acid sequence of both pG constructs is shown in table 2.

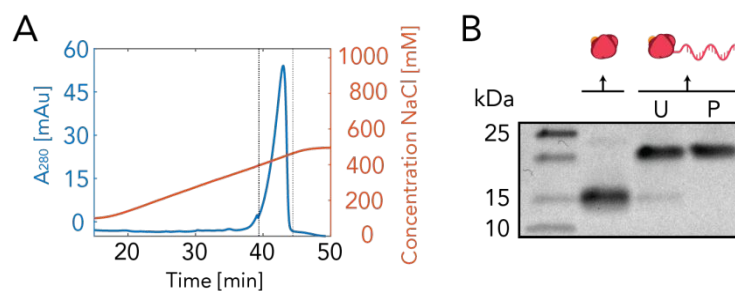

**Figure S3.** Overview of the purification of pG-ODN constructs. (A) Elution trace of pG-ODN using fast protein liquid chromatography (FPLC) monitored by on-line absorption at 280 nm. The large peak, indicated by the dashed lines, was collected. (B) SDS-PAGE gel analysis under non-reducing conditions of the collected fraction, showing successful removal of uncoupled pG. Labels: U, unpurified pG-ODN reaction mixture; P, purified pG-ODN

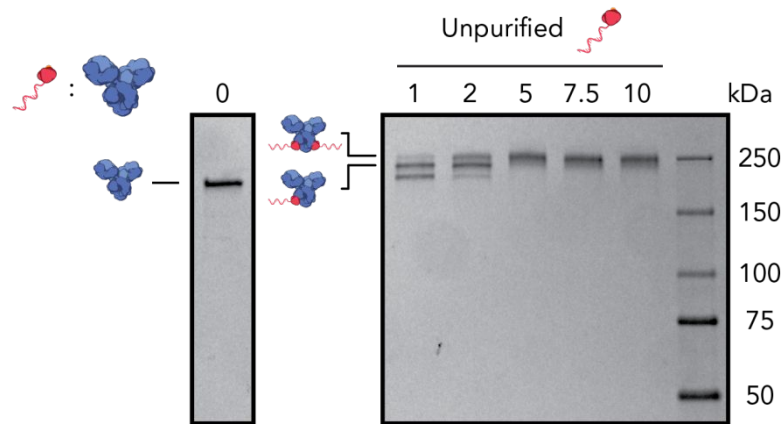

**Figure S4.** SDS-PAGE gel analysis under non-reducing conditions of Human IgG<sub>1</sub> incubated with varying molar equivalents of unpurified pG-ODN. The use of 5 molar equivalents of the pG-ODN construct results in covalent labeling of all the heavy chains of the human IgG<sub>1</sub> antibody.

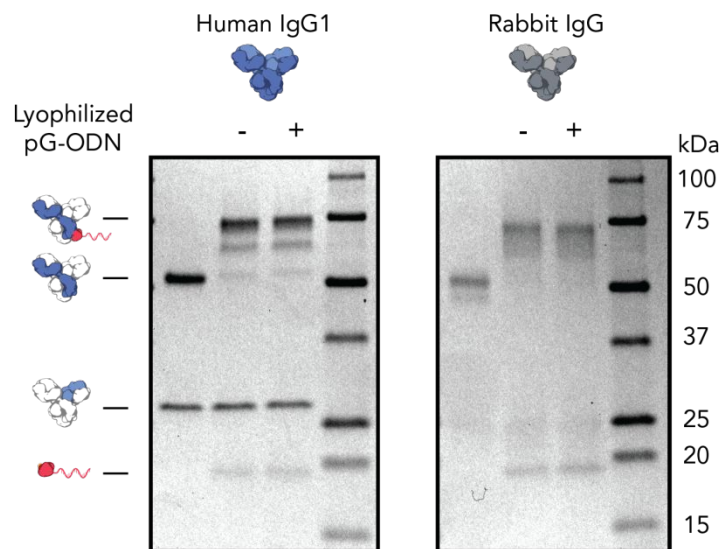

**Figure S5.** SDS-PAGE gel analysis under reducing conditions of pG-ODN antibody coupling before (-) and after (+) lyophilization of pG-ODN. For both Cetuximab (hIgG<sub>1</sub>) and Rabbit IgG, no decrease in coupling efficiency is observed when pG-ODN was lyophilized prior to antibody coupling.

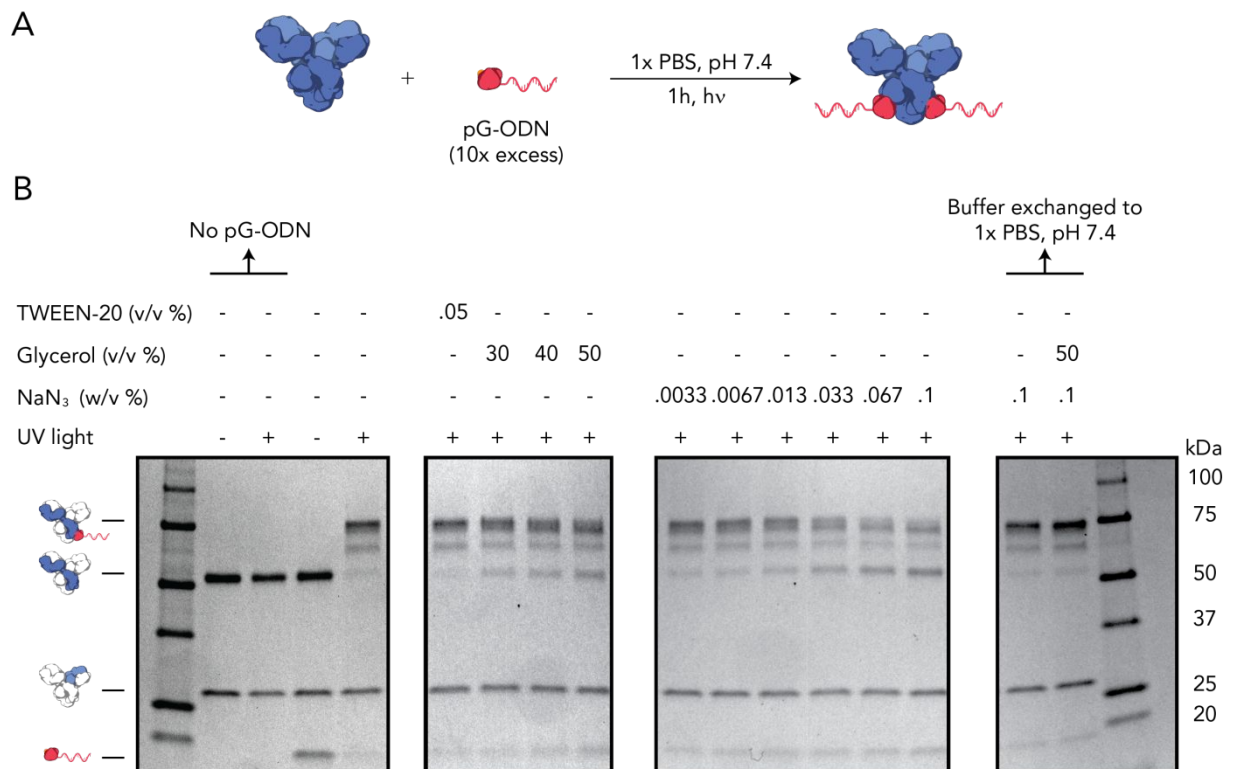

**Figure S6.** Coupling efficiency of pG-ODN to Cetuximab in the presence of multiple additives. (A) Schematic overview of the reaction conditions. (B) SDS-PAGE gel analysis under reducing conditions of Cetuximab coupled to pG in the presence of TWEEN-20, glycerol and sodium azide (NaN<sub>3</sub>). Both glycerol and sodium azide inhibit pG-ODN-antibody formation. Buffer exchanging an antibody solution that contains 0.1% sodium azide in the presence and absence of 50% glycerol to 1x PBS, pH 7.4 using ultrafiltration fully restores the coupling efficiency.

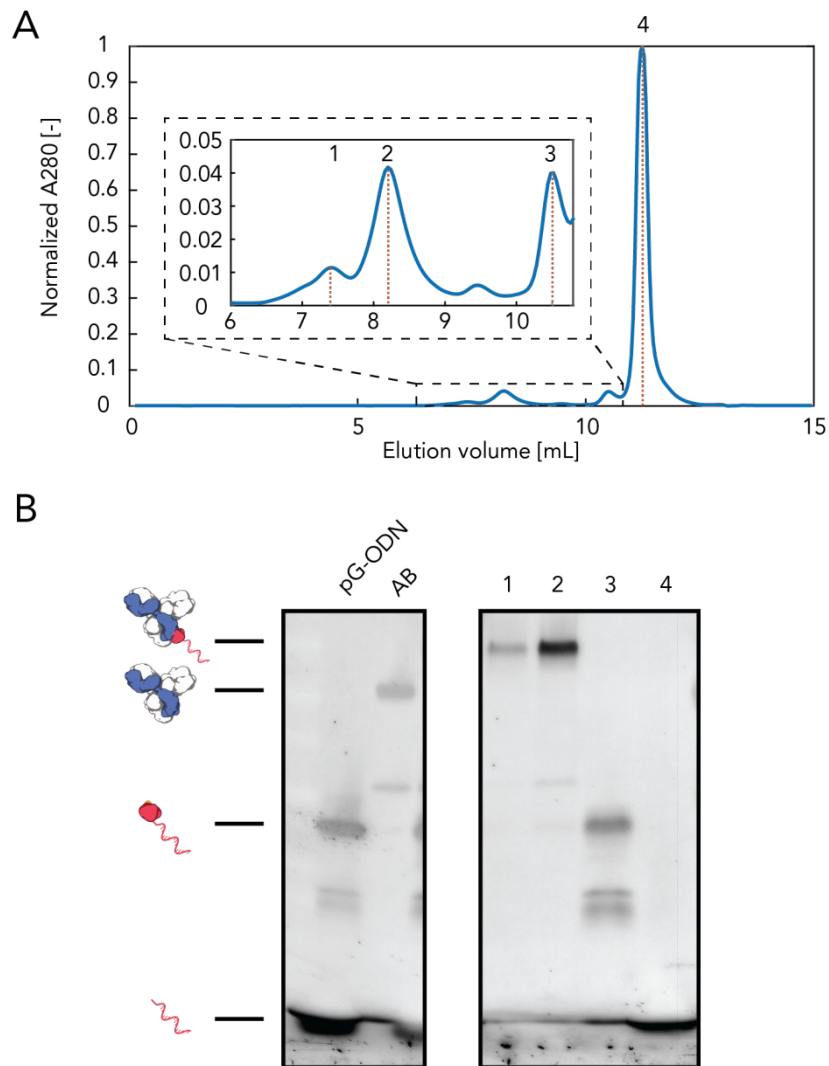

**Figure S7.** Purification of pG-ODN-antibody constructs using size exclusion chromatography (SEC). (A) Chromatogram showing the separation of pG-ODN-antibody (1, 2), pG-ODN (3) and the uncoupled ODN (4). (B) SDS-PAGE gel analysis of the 4 peaks shown in the chromatogram stained with SYBR Gold shows the successful separation of pG-ODN-antibody and pG-ODN constructs. Label: AB, Antibody (Cetuximab)

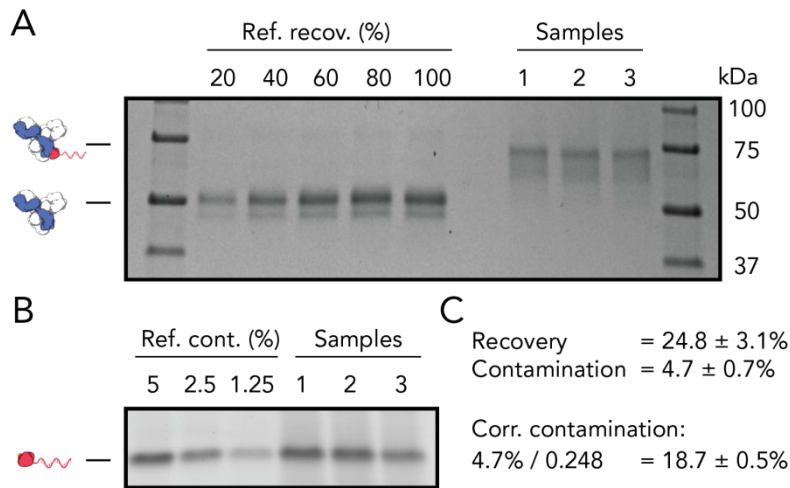

**Figure S8.** Recovery and purity of pG-ODN-antibody constructs purified by ultrafiltration. (A) SDS-PAGE gel analysis under reducing conditions stained with Coomassie Blue. The gel band intensity corresponding to the recovered heavy chain of the pG-ODN-antibody was compared to a reference. (B) SDS-PAGE gel analysis under non-reducing conditions stained with SYBR Gold. The intensity of the band corresponding to pG-ODN after purification was compared to a reference. (C) Calculation of the recovery and contamination. The contamination was corrected based on the recovery of the pG-ODN-antibody construct.

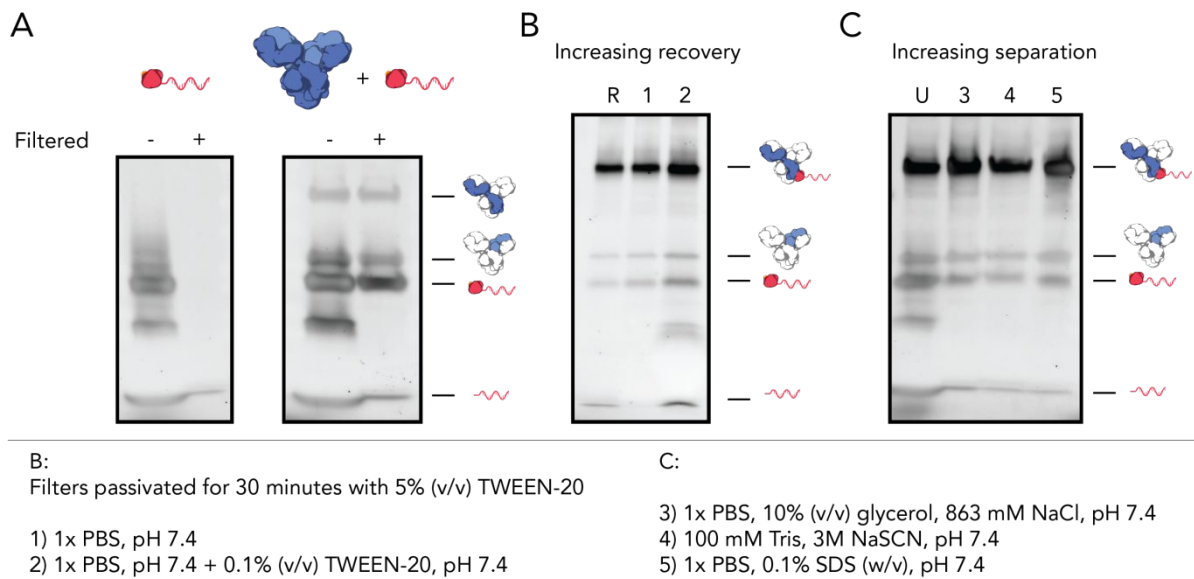

**Figure S9.** Optimization of pG-ODN-antibody purification using ultrafiltration. All SDS-PAGE gels were performed under reducing conditions and stained with SYBR Gold (A) pG-ODN removal using ultrafiltration in the absence (left) and presence of Cetuximab (right). Only in the absence of Cetuximab, pG-ODN was able to pass the 100 kDa molecular weight cut-off (MWCO) membrane. (B) pG-ODN removal using filters that were passivated with 5% TWEEN-20 for 30 minutes. When 0.1% (v/v) was included in the washing buffer, the recovery was increased to 68% compared to a reference filter that was not passivated (R). (C) pG-ODN removal using alternative (denaturing) washing buffers. In all cases most of the maleimide-ODN was removed successfully, however the separation between pG-ODN and pG-ODN-antibody constructs remained limited. Labels: U, unpurified sample.

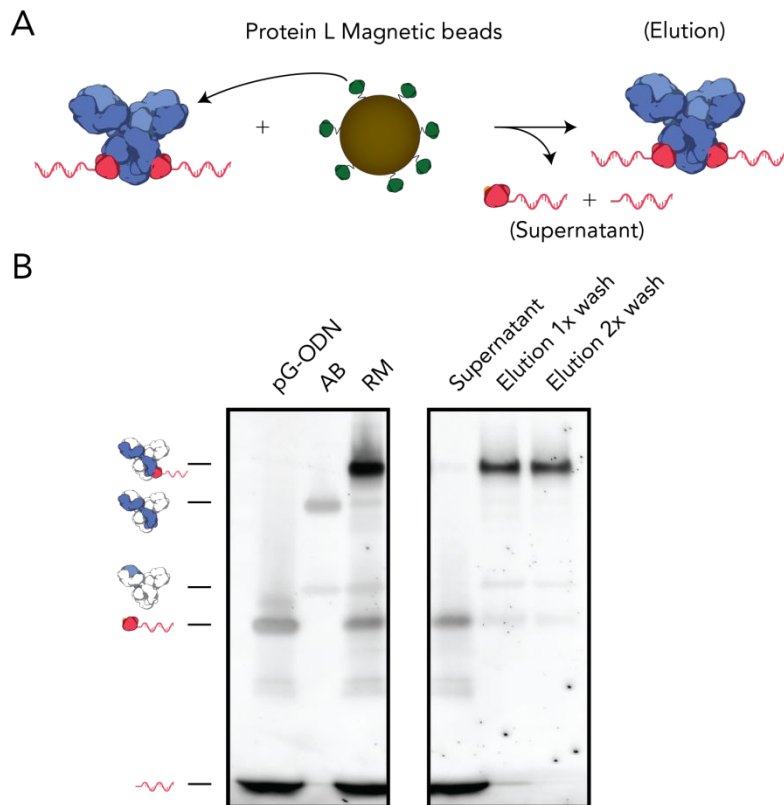

**Figure S10.** Purification of pG-ODN-Cetuximab using protein L magnetic beads. (A) Schematic overview of the purification process. Protein L binds to the light chain of Cetuximab and beads are recovered using a magnetic stand. (B) SDS-PAGE gel analysis under reducing conditions of different fractions of the purification. Both maleimide-ODN and pG-ODN remain in the supernatant while pG-ODN-antibody constructs are captured by the magnetic beads and recovered in the elution fraction. Labels: AB, Antibody (Cetuximab); RM, unpurified reaction mixture.



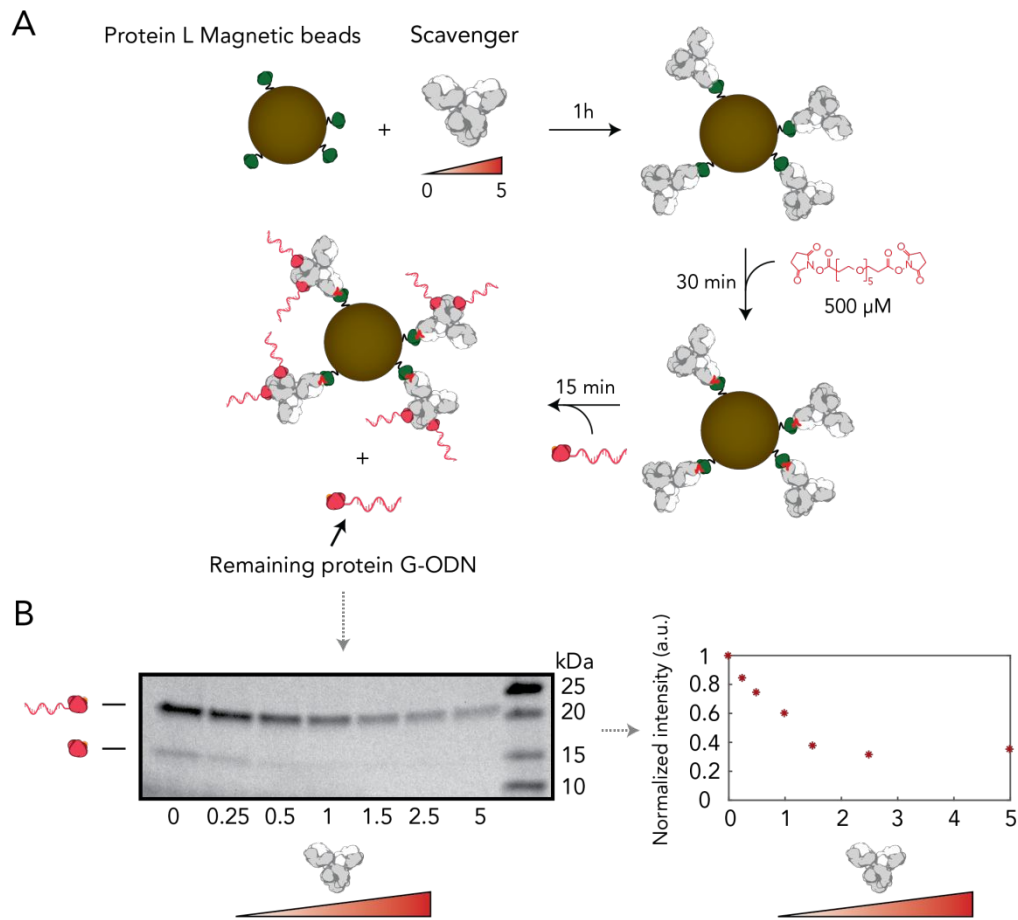

**Figure S11.** Optimization of the pG-ODN capturing capacity of the antibody-functionalized protein L magnetic beads as a function of the scavenger antibody. (A) Schematic overview of the synthesis of scavenging beads. Protein L magnetic beads were incubated with different equivalents of a scavenging antibody. In this case 1 equivalent was defined as the maximum capacity of a protein L bead (110  $\mu$ g antibody/mg of bead). The antibody was covalently attached to the beads and the beads were incubated with pG-ODN. The beads were removed using a magnetic stand and the amount of remaining pG-ODN was quantified. (B) SDS-PAGE gel analysis under reducing conditions of the remaining amount of pG-ODN as a function of the amount of scavenger antibody. Gel band intensity shows that  $\geq 2$  equivalents of scavenger antibody are required to achieve maximum pG-ODN binding capacity.

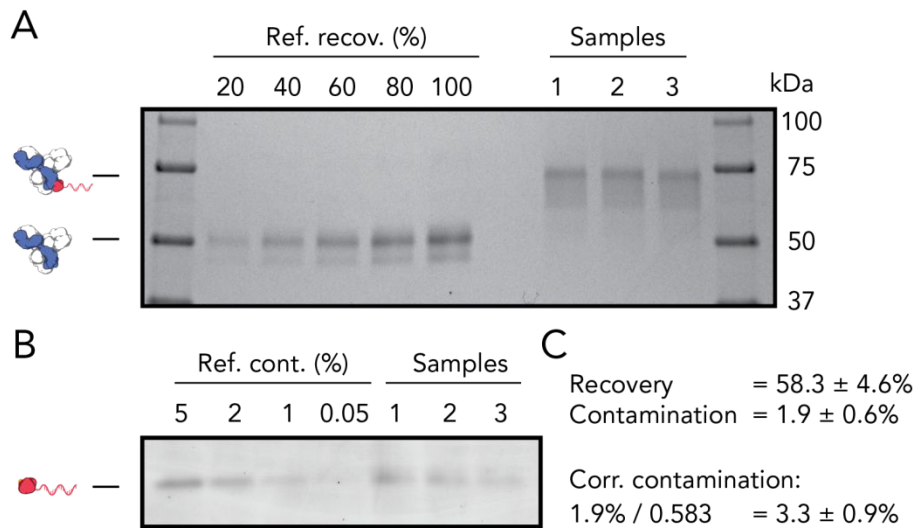

**Figure S12.** Recovery and purity of pG-ODN-antibody constructs purified using scavenging beads. (A) SDS-PAGE gel analysis under reducing conditions stained with Coomassie Blue. The gel band intensity corresponding to the recovered heavy chain of the pG-ODN-antibody was compared to a reference. (B) SDS-PAGE gel analysis under non-reducing conditions stained with SYBR Gold. The intensity of the band corresponding to pG-ODN after purification was compared to a reference. (C) Calculation of the recovery and contamination. The contamination was corrected based on the recovery of the pG-ODN-antibody construct.

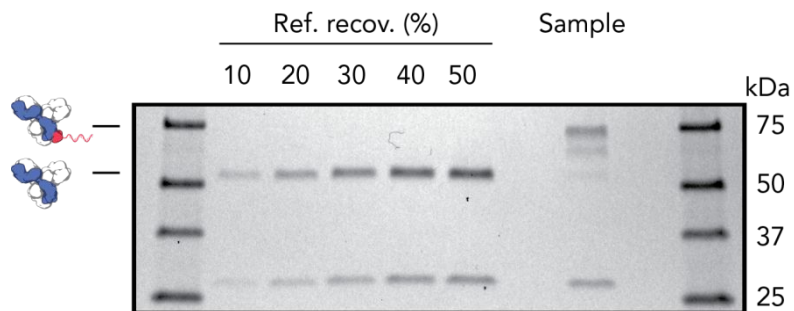

**Figure S13.** Recovery analysis of pG-ODN-Cetuximab using scavenging beads for purification. SDS-PAGE gel analysis under reducing conditions stained with Coomassie Blue. The gel band intensity corresponding to the recovered light chain of the pG-ODN-antibody was compared to a reference which showed a recovery of 30%

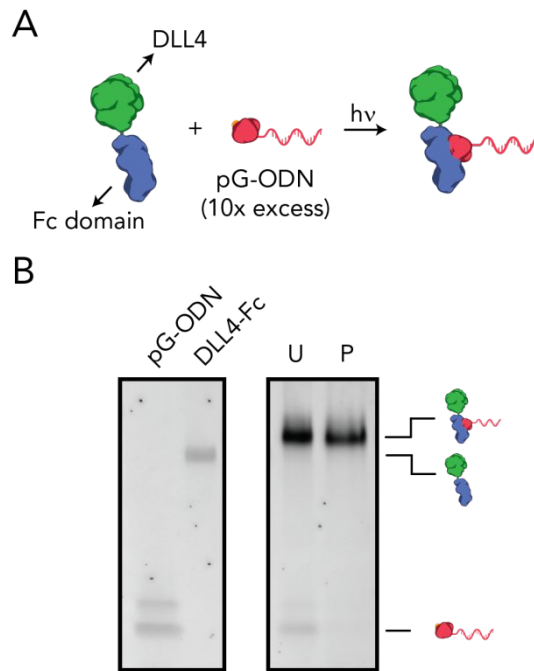

**Figure S14.** Labeling and purification of the Fc-fusion protein DLL4-Fc. (A) Schematic overview of the protein and labeling of DLL4-Fc using 10-fold molar excess of pG-ODN. (B) SDS-PAGE gel analysis under reducing conditions of unpurified (U) and purified (P) pG-ODN-DLL4-Fc using scavenging beads. The gel was stained with SYBR gold.

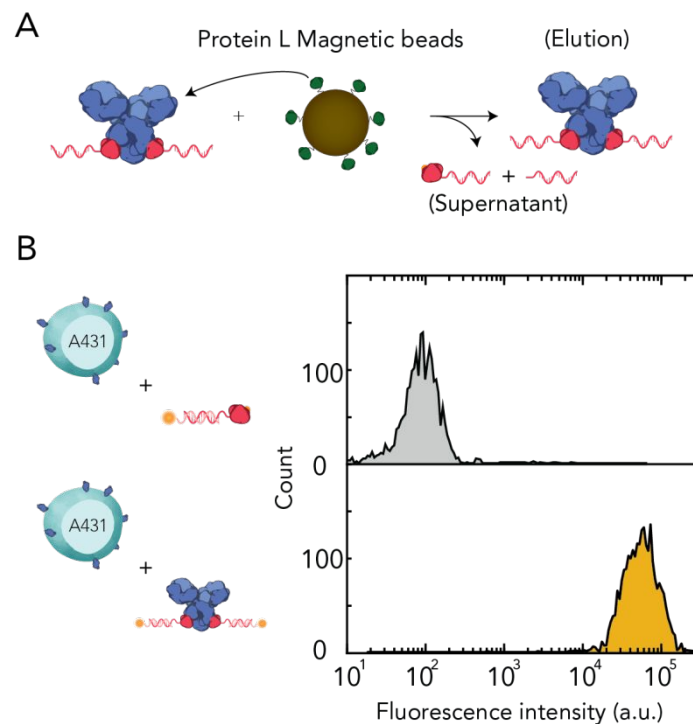

**Figure S15.** Antibody activity after direct purification of the pG-ODN-antibody construct using protein L functionalized magnetic beads. (A) Schematic overview of the purification process. Protein L binds to the light chain of Cetuximab and beads are recovered using a magnetic stand. (B) Flow cytometric analysis of EGFR-expressing A431 cells using 10 nM pG-ODN-functionalized Cetuximab hybridized to a CY5-labeled imager strand. Fluorescent intensity of pG-ODN-Cetuximab labeled A431 cells was compared to A431 cells incubated with only pG-ODN.

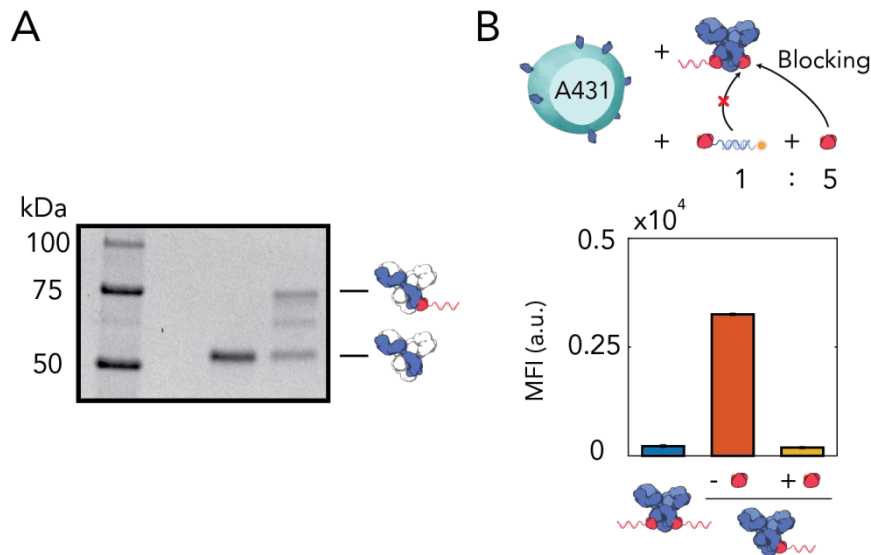

**Figure S16.** Blocking of free Fc sites using free pG during cellular labeling. (A) SDS-PAGE gel analysis under reducing conditions shows that ~50% of the Fc chains are covalently labeled with pG-ODN. (B) Partly labeled pG-ODN-Cetuximab was incubated with 20-fold molar excess of a competing pG-ODN sequence and 100-fold molar excess of pG to block free Fc sites. Flow cytometric analysis of EGFR-expressing A431 cells using 10 nM pG-ODN-functionalized Cetuximab shows that cross-contamination is observed when free Fc sites are not blocked with pG. Introduction of a 100-fold molar excess of pG shows the same median fluorescence intensity compared to quantitatively labeled pG-ODN-Cetuximab, indicating that successful blocking of Fc sites achieved. MFI represent the median fluorescence intensity and error bars represent SD (n=3).

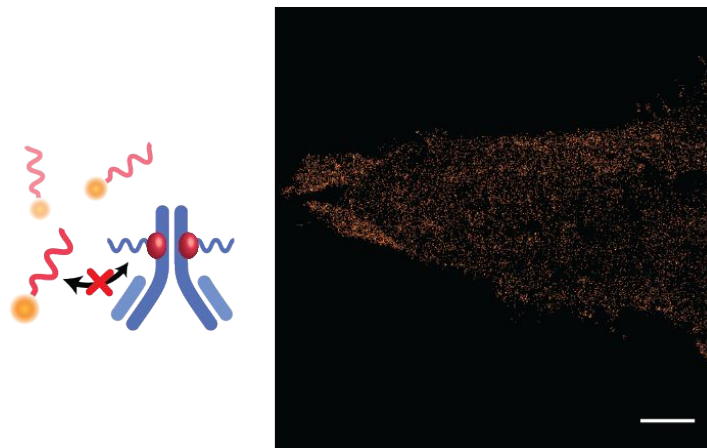

**Figure S17.** Aspecific interaction of imager strands in DNA-PAINT with cellular components. A431 carcinoma cells are labeled with a pG-ODN-Cetuximab construct containing a short (11 nt) docking strand (docking 4) and fixated to a glass slide. DNA-PAINT super-resolution image obtained using ATTO647N-functionalized imager strands which are not complementary to the docking strand (imager 5) (20,000 frames, 20-Hz frame rate). Scale bar, 5  $\mu\text{m}$ .

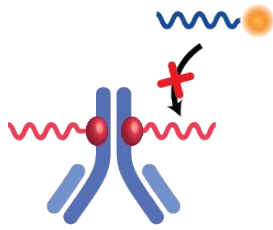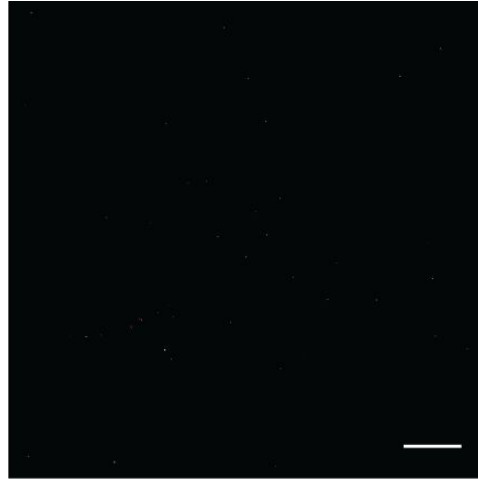

**Figure S18.** Aspecific interaction of imager strands in dSTORM with cellular components. A431 carcinoma cells are labeled with a pG-ODN-Cetuximab construct containing a long (20 nt) docking strand, not complementary to the imager (docking 5), and fixated to a glass slide. dSTORM super-resolution image obtained using CY5-functionalized imager strands (imager 1) (20,000 frames, 65.5-Hz frame rate). Scale bar, 5  $\mu\text{m}$ .

## Supplementary materials and methods:

### Antibodies/Fc-fusion proteins

The following antibodies/Fc-fusion proteins were used to characterize the coupling of pG-ODN to antibodies from different host species: Cetuximab (anti-EGFR red.) (Erbitux, Merck), monoclonal anti-GFP mouse IgG2a (JL-8; catalog number: 632380, Clontech), Rabbit IgG Isotype Control (catalog number: 02-6102, Invitrogen) and DLL4-hlgG1-Fc (catalog number: 10171-H02H, Sino Biological). For the cellular labeling the following antibodies were used: monoclonal anti-CD45 mouse IgG2a (F10-89-4; catalog number: MA5-16669, Invitrogen) and monoclonal anti-CD31 mouse IgG2a (HEC7; catalog number: MA3100, Invitrogen)

### Cells and complementary culture medium

A431 and Jurkat T cells were cultured in Roswell Park Memorial Institute (RPMI, Gibco) 1640 Medium fortified with 10% FBS and 1% penicillin and streptomycin. Human Umbilical Vein Endothelial Cells (HUVECs) were a kind gift from Dr. Cecilia Sahlgren. HUVECs were cultured in Endothelial Base Medium (EBM-2, Lonza) with additives of 2% FBS, 0.04% Hydrocortisone, 0.4% hFGF-B, 0.1% VEGF, 0.1% R3-IGF-1, 0.1% ascorbic acid, 0.1% hEGF, 0.1% GA-1000, and 0.1% heparin (Lonza) supplemented with 1% penicillin/streptomycin. All cells were incubated at 37 °C and 5% CO<sub>2</sub>.

### SDS-PAGE

For SDS-PAGE analysis 4-20% SDS-PAGE Mini-PROTEAN® TGX Precast gels (Bio-rad) were used (Novex® by Life Technologies). The running buffer consists of 25 mM Tris, 192 mM glycine, 0.1% SDS, pH 8.3. Samples were heated at 95 °C for 5 min in 1x SDS Sample Buffer (62.5 mM Tris, 10% Glycerol, 2.5% SDS (w/v), 0.01% Bromophenolblue, pH 6.8) before loading. When SDS-PAGE was performed under reducing conditions DTT to a final concentration of 50 mM was added. The gels were run at 150 V for either 40 minutes (analyzing pG-ODN coupling) or 60 minutes (analyzing pG-ODN-antibody labeling). To visualize DNA bands, the gel was stained in 50 mL 1x SYBR Gold (Thermo scientific) and to visualize protein bands Coomassie Brilliant Blue G-250 (Bio-Rad) was used.

### Buffer exchange/ODN removal using Amicon spin filters

A spin-filter was pre-wetted with 500 µL of the buffer of interest and spun for 5 minutes at 14,000 xg at 4 °C. The remaining concentrate was removed after centrifugation. Before loading, the reaction mixture was diluted to a final volume of 500 µL in the buffer of interest. The sample was added to the filter and centrifuged for 5 minutes at 14,000 xg at 4 °C. This step was repeated for a total of three washing steps. Eventually, the desalted concentrate was recovered by inverting the filter and spinning for 6 minutes at 1,000 xg at 4 °C.

### Fast protein liquid chromatography (FPLC) with an anion-exchange column

For FPLC an anion-exchange a HiTrap Q HP column (1 mL, GE Healthcare) was used. The column was equilibrated with equilibration buffer (50 mM Tris-HCl, pH 7.5). The conjugation reaction mixture was diluted five-fold in equilibration buffer and applied manually to the column. The column was washed with equilibration buffer supplemented with 100 mM NaCl and subsequently a salt gradient was applied with a start and end concentration of 100 and 500 mM NaCl, respectively, and a flow rate of 1 mL/min. Elution fractions of 0.5 mL were collected and analyzed by measuring on-line absorption at 280 nm.

### Quadrupole time-of-flight mass spectrometry (Q-Tof)

For Q-Tof an aliquot of pG was buffer exchanged using Amicon 3 kDa MWCO centrifugal filters (Merck Millipore) to ultrapure H<sub>2</sub>O to a final concentration of 1 mg/mL. A sample of 0.1 µL pG was injected to an Agilent Polaris C18A RP column with a flow of 0.3 mL/min and a 15-60% acetonitrile gradient containing 0.1% formic acid. Mass spectra were measured on a Xevo G2 QToF mass spectrometer (Waters) in positive mode and deconvoluted with MaxEnt Deconvolution software.

### Size exclusion chromatography (SEC)

Size exclusion chromatography was performed on an Agilent 1260 Infinity II Bio-inert LC System using a Bio-SEC-5 column (5 µm, 300 Å, 7.8\*300 mm, Agilent). The column was equilibrated with 5 column volumes of 1x PBS, pH 7.4 using a flow rate of 1 mL/min. The column was coupled to a 280 nm UV spectrophotometer and a fraction collector. 95 µL sample was injected and elution fractions of 0.2 mL were collected and analyzed on SDS-PAGE under reducing conditions

### **Direct purification using protein L beads**

This procedure is optimized to purify 50  $\mu\text{L}$  of 4  $\mu\text{M}$  antibody-pG-ODN from 40  $\mu\text{M}$  uncoupled pG-ODN using 25  $\mu\text{L}$  of protein L beads. In a typical reaction 25  $\mu\text{L}$  of Pierce™ protein L magnetic beads was added to 75  $\mu\text{L}$  washing buffer (1x PBS, 0.05% TWEEN-20, pH 7.4). The beads were washed twice in 200  $\mu\text{L}$  washing buffer after which the magnetic beads were incubated with 50  $\mu\text{L}$  of the reaction mixture diluted to a final volume of 200  $\mu\text{L}$  in washing buffer. Reaction was rotated at for 1h at 4 °C. Subsequently, the magnetic beads were collected with a magnetic stand and the supernatant was discarded. The protein L beads were washed twice using 200  $\mu\text{L}$  washing buffer. To collect the antibody-pG-ODN, beads were incubated for 5 minutes in elution buffer (100 mM Tris-HCl, 1 M NaSCN, pH 7.5). The elution fraction was desalted using a Zeba™ spin desalting column, 7000 MWCO, 0.5 mL (Thermo scientific).

### **Blocking of free Fc sites**

Cetuximab was incubated for 1h under UV-illumination using 3-fold molar excess of pG-ODN to achieve 50% labeling of Fc domains. 20-fold molar excess of a competing pG-ODN was added to the partly labeled pG-ODN-Cetuximab in the presence and absence of 100-fold molar excess pG. The reaction mixture was shaken at 600 RPM for 1h at 20 °C. Subsequently, 12.5  $\mu\text{L}$  A431 cells ( $3.5 \times 10^6$  cells/mL) were incubated with the reaction mixture in a final reaction volume of 250  $\mu\text{L}$  and a final concentration of 10 nM pG-ODN-Cetuximab. Incubation was performed at 400 RPM for 30 minutes at 20 °C. After incubation the cells were pelleted and redissolved in labeling buffer (1x PBS, 0.1% (w/v) BSA, pH 7.4) containing 1  $\mu\text{M}$  pG and 100 nM of a CY5-labeled ODN complementary to the competing pG-ODN sequence. The cells were incubated and centrifuged as described above and analyzed using flow cytometry.

### **Flow cytometry**

Flow cytometry was performed on a FACS Aria III (BD Biosciences) equipped with a 70  $\mu\text{m}$  nozzle. Single cell events were gates based on the linear relation between forward scatter height (FSC-H) and forward scatter area (FSC-A). For each sample 2,000 gated events were collected and analyzed using custom written Matlab scripts.

### Table S1: DNA sequences

All DNA oligonucleotides were purchased from Integrated DNA Technologies. Amino-functionalized ODNs were obtained desalted and dissolved in DNase/Rnase-free water at a concentration of 1 mM and fluorescently labeled ODNs were HPLC purified and dissolved at a concentration of 250  $\mu$ M

#### SDS-PAGE analysis pG-ODN/antibody coupling

| Name                            | Sequence (5' to 3')                            | Length (nt) |
|---------------------------------|------------------------------------------------|-------------|
| Docking 1 (Cetuximab), <b>a</b> | CCC TAG AGT GAG TCG TAT GA/ <sub>3</sub> AmMO/ | 20          |

#### Flow cytometry

| Name                            | Sequence (5' to 3')                                 | Length (nt) |
|---------------------------------|-----------------------------------------------------|-------------|
| Imager 1 (Cetuximab), <b>a'</b> | TCA TAC GAC TCA CTC TAG GGT T/ <sub>3</sub> Cy5Sp/  | 22          |
| Docking 2 (aCD45), <b>b</b>     | / <sub>5</sub> AmMC6/AC TGA CTG ACT GAC TGA CTG     | 20          |
| Imager 2 (aCD45), <b>b'</b>     | / <sub>5</sub> Cy5/CA GTC AGT CAG TCA GTC AGT       | 20          |
| Docking 3 (aCD31), <b>c</b>     | GTC CAT GCT CAG GAT TGC GA / <sub>3</sub> AmMO/     | 20          |
| Imager 3 (aCD31), <b>c'</b>     | TCG CAA TCC TGA GCA TGG ACT T / <sub>3</sub> Cy5Sp/ | 22          |

#### DNA-PAINT & dSTORM

| Name                                     | Sequence (5' to 3')                            | Length (nt) |
|------------------------------------------|------------------------------------------------|-------------|
| Docking 4 (DNA-PAINT)                    | / <sub>5</sub> AmMC6/TTA TAC ATC TA            | 11          |
| Imager 4 (DNA-PAINT, c. <sup>1</sup> )   | CTA GAT GTA T/ <sub>3</sub> ATTO647NN/         | 10          |
| Imager 5 (DNA-PAINT, n.c. <sup>2</sup> ) | TAT GTA GAT C/ <sub>3</sub> ATTO647NN/         | 10          |
| Docking 5 (dSTORM, n.c. <sup>2</sup> )   | TTA TAC ATC TAG TCG TGT GA/ <sub>3</sub> AmMO/ | 20          |

<sup>1</sup> complementary

<sup>2</sup> non-complementary

For dSTORM imaging docking 1 and imager 1 were used to generate figure 5.



**Table S2: Protein G sequences**

The single-letter amino acid code is shown in uppercase above the corresponding DNA sequence. The cysteine is shown in purple, the *strep*-tag in orange, pG in blue, the hexahistidine tag in green and the amber stop codon, coding for the non-natural amino acid *p*-Bpa, is indicated in red.

**pG-C2:**

```

1      M C W S H P Q F E K G T M T F K L I I N
      ATGTGCTGGTCCCATCCGCAGTTCGAGAAAAGGTACCATGACATTTAAACTGATAATCAAC

61     G K T L K G E I T I E A V D A * E A E K
      GGCAAAACCTTAAAAGGGGAGATCACAATTGAGGCAGTCGATGCCCTAGGAAGCCGAGAAA

121    I F K Q Y A N D Y G I D G E W T Y D D A
      ATCTTTAAACAATATGCTAATGATTATGGTATTGACGGAGAATGGACGTATGACGATGCG

181    T K T F T V T E E F T S G G S G D D H H
      ACAAAAACCTTTCACCGTAACTGAGGAATTCAGTGGTGGAAAGTGGGGACGATCATCAT

241    H H H H *
      CATCATCATCATTAA
```

**pG-C3:**

```

1      M S C W S H P Q F E K G T M T F K L I I
      ATGAGTTGCTGGTCCCATCCGCAGTTCGAGAAAAGGTACCATGACATTTAAACTGATAATC

61     N G K T L K G E I T I E A V D A * E A E
      AACGGCAAAACCTTAAAAGGGGAGATCACAATTGAGGCAGTCGATGCCCTAGGAAGCCGAG

121    K I F K Q Y A N D Y G I D G E W T Y D D
      AAAATCTTTAAACAATATGCTAATGATTATGGTATTGACGGAGAATGGACGTATGACGAT

181    A T K T F T V T E E F T S G G S G D D H
      GCGACAAAACCTTTCACCGTAACTGAGGAATTCAGTGGTGGAAAGTGGGGACGATCAT

241    H H H H H *
      CATCATCATCATTAA
```
